# Supplementary material
Source: publisher figshare collection journal article supplement (https://sage.figshare.com/ndownloader/files/20152562)
Supplement: Supplementary file 1 [file 20152562]

## HOUSE VARIABLES

NameFull

Cong

MemberID

BillID

BillNo

BillType

Title

Major

Subtopic

ByReq

Chamber

Commem

Cosponsr

Year

Month

IntrDate

MRef

Mult

MultNo

PassH

Notes

PassS

PLaw

PLawDate

PLawNo

Private

Refer102

Refer103

Refer104

Refer105

Refer106

Refer107

Refer108

Refer109

Refer110

Refer111

Refer112

Refer114

Refer115

Refer116

Refer117

Refer118

Refer119

Refer120

Refer121

Refer122

Refer123

Refer124  
Refer125  
Refer150  
Refer151  
Refer152  
Refer153  
Refer154  
Refer308  
ReportH  
ReportS  
Veto  
Age  
CumHServ  
CumSServ  
Delegate  
District  
DW1  
DW2  
FrstConH  
Gender  
ICPSRNo  
Majority  
NameFrst  
NameLast  
Party  
Postal  
State  
NotesBio  
ComChr  
ComC102  
ComC103  
ComC104  
ComC105  
ComC106  
ComC107  
ComC108  
ComC109  
ComC110  
ComC111  
ComC112  
ComC114  
ComC115  
ComC116  
ComC117  
ComC118  
ComC119  
ComC120  
ComC121  
ComC122  
ComC123  
ComC124  
ComC125

ComC150  
ComC151  
ComC152  
ComC153  
ComC154  
ComC308  
ComM102  
ComM103  
ComM104  
ComM105  
ComM106  
ComM107  
ComM108  
ComM109  
ComM110  
ComM111  
ComM112  
ComM114  
ComM115  
ComM116  
ComM117  
ComM118  
ComM119  
ComM120  
ComM121  
ComM122  
ComM123  
ComM124  
ComM125  
ComM150  
ComM151  
ComM152  
ComM153  
ComM154  
ComM308  
ComRMM  
ComR102  
ComR103  
ComR104  
ComR105  
ComR106  
ComR107  
ComR108  
ComR109  
ComR110  
ComR111  
ComR112  
ComR114  
ComR115  
ComR116  
ComR117  
ComR118

ComR119  
ComR120  
ComR121  
ComR122  
ComR123  
ComR124  
ComR125  
ComR150  
ComR151  
ComR152  
ComR153  
ComR154  
ComR308  
LeadCham  
LeadComm  
LeadSubC  
NotesCom  
SubChr  
SubC102  
SubC103  
SubC104  
SubC105  
SubC106  
SubC107  
SubC108  
SubC109  
SubC110  
SubC111  
SubC112  
SubC114  
SubC115  
SubC116  
SubC117  
SubC118  
SubC119  
SubC120  
SubC121  
SubC122  
SubC123  
SubC124  
SubC125  
SubC150  
SubC151  
SubC152  
SubC153  
SubC154  
SubC308  
SubRMM  
SubR102  
SubR103  
SubR104  
SubR105

SubR106  
SubR107  
SubR108  
SubR109  
SubR110  
SubR111  
SubR112  
SubR114  
SubR115  
SubR116  
SubR117  
SubR118  
SubR119  
SubR120  
SubR121  
SubR122  
SubR123  
SubR124  
SubR125  
SubR150  
SubR151  
  
SubR152  
  
SubR153  
SubR154  
SubR308

## DESCRIPTION

Full name of sponsor

Congress

PooleID-Congress-Party

Congress-Type-Number

Bill Number

HR=House bill; S=Senate bill

Short description scanned from the House and Senate Journals (1947-72; Last version of title from <http://thomas.loc.gov> (1973-present)

Policy Agendas major topic

Policy Agendas subtopic

Introduced by request (1973-present only from <http://thomas.loc.gov>)

House or Senate

Commemorative bill (assigned by our coders to bills that name buildings, coin commemorative medals, designate non-official memorials days etc)

Number of cosponsors

Year introduced

Month introduced

Day-Month-Year

Did the sponsor serve on a committee to which the bill was referred?

Was the bill referred to more than one committee?

How many committees?

Did the bill pass the House?

Did the bill pass the Senate?

Did the bill become law? Note that because only the House or Senate version of a bill can become law, the law success rate is much lower than the chamber pass rate

When did the bill become law?

Public Law number

Private Bill (private bills are directed towards specific individuals or organizations and should be excluded from most analyses)

Referred to the Committee on Agriculture

Referred to the Committee on Appropriations

Referred to the Committee on Armed Services

Referred to the Committee on Banking

Referred to the Committee on Budget

Referred to the Committee on Government Reform

Referred to the Committee on Education

Referred to the Committee on Commerce

Referred to the Committee on International Relations

Referred to the Committee on Government Reform

Referred to the Committee on House Administration

Referred to the Committee on Resources

Referred to the Committee on Judiciary

Referred to the Committee on Merchant Marine and Fisheries

Referred to the Committee on Post Office and Civil Service

Referred to the Committee on Transportation and Infrastructure

Referred to the Committee on Rules

Referred to the Committee on Science

Referred to the Committee on Small Business

Referred to the Committee on Standards

Referred to the Committee on Veterans

Referred to the Committee on Ways and Means  
Referred to the Committee on Un-American Activities  
Referred to the Select Aging Committee  
Referred to the Select Committee on Intelligence  
Referred to the Select Committee on Children, Youth and Families  
Referred to the Select Committee on Hunger  
Referred to the Select Committee on Narcotics Abuse

Reported to the House by a committee  
Reported to the Senate by a committee  
Vetoed by President  
Age of Sponsor  
Cumulative years served in House  
Cumulative years served in Senate  
Sponsor is a delegate of a territory or district  
Congressional district of sponsor  
DW-Nominate 1st dimension  
DW-Nominate 2nd dimension  
First Congress served - House  
Gender of sponsor  
Poole and Rosenthal's improved ICPSR codes  
Sponsor is member of majority party  
First name of sponsor  
Last name of sponsor  
Party of Sponsor (100=Democrat, 200=Republican, plus others)  
Postal code of district  
State of sponsor

Sponsor chairs a committee  
Sponsor chairs Committee on Agriculture  
Sponsor chairs Committee on Appropriations  
Sponsor chairs Committee on Armed Services  
Sponsor chairs Committee on Banking  
Sponsor chairs Committee on Budget  
Sponsor chairs Committee on Government Reform  
Sponsor chairs Committee on Education  
Sponsor chairs Committee on Commerce  
Sponsor chairs Committee on International Relations  
Sponsor chairs Committee on Government Reform  
Sponsor chairs Committee on House Administration  
Sponsor chairs Committee on Resources  
Sponsor chairs Committee on Judiciary  
Sponsor chairs Committee on Merchant Marine and Fisheries  
Sponsor chairs Committee on Post Office and Civil Service  
Sponsor chairs Committee on Transportation and Infrastructure  
Sponsor chairs Committee on Rules  
Sponsor chairs Committee on Science  
Sponsor chairs Committee on Small Business  
Sponsor chairs Committee on Standards  
Sponsor chairs Committee on Veterans  
Sponsor chairs Committee on Ways and Means  
Sponsor chairs Committee on Un-American Activities

Sponsor chairs Select Aging Committee  
Sponsor chairs Select Committee on Intelligence  
Sponsor chairs Select Committee on Children, Youth and Families  
Sponsor chairs Select Committee on Hunger  
Sponsor chairs Select Committee on Narcotics Abuse

Sponsor is a member of Committee on Agriculture  
Sponsor is a member of Committee on Appropriations  
Sponsor is a member of Committee on Armed Services  
Sponsor is a member of Committee on Banking  
Sponsor is a member of Committee on Budget  
Sponsor is a member of Committee on Government Reform  
Sponsor is a member of Committee on Education  
Sponsor is a member of Committee on Commerce  
Sponsor is a member of Committee on International Relations  
Sponsor is a member of Committee on Government Reform  
Sponsor is a member of Committee on House Administration  
Sponsor is a member of Committee on Resources  
Sponsor is a member of Committee on Judiciary  
Sponsor is a member of Committee on Merchant Marine and Fisheries  
Sponsor is a member of Committee on Post Office and Civil Service  
Sponsor is a member of Committee on Transportation and Infrastructure  
Sponsor is a member of Committee on Rules  
Sponsor is a member of Committee on Science  
Sponsor is a member of Committee on Small Business  
Sponsor is a member of Committee on Standards  
Sponsor is a member of Committee on Veterans  
Sponsor is a member of Committee on Ways and Means  
Sponsor is a member of Committee on Un-American Activities  
Sponsor is a member of Select Aging Committee  
Sponsor is a member of Select Committee on Intelligence  
Sponsor is a member of Select Committee on Children, Youth and Families  
Sponsor is a member of Select Committee on Hunger  
Sponsor is a member of Select Committee on Narcotics Abuse

Sponsor is Ranking Minority of a Committee  
Sponsor is Ranking Minority of Committee on Agriculture  
Sponsor is Ranking Minority of Committee on Appropriations  
Sponsor is Ranking Minority of Committee on Armed Services  
Sponsor is Ranking Minority of Committee on Banking  
Sponsor is Ranking Minority of Committee on Budget  
Sponsor is Ranking Minority of Committee on Government Reform  
Sponsor is Ranking Minority of Committee on Education  
Sponsor is Ranking Minority of Committee on Commerce  
Sponsor is Ranking Minority of Committee on International Relations  
Sponsor is Ranking Minority of Committee on Government Reform  
Sponsor is Ranking Minority of Committee on House Administration  
Sponsor is Ranking Minority of Committee on Resources  
Sponsor is Ranking Minority of Committee on Judiciary  
Sponsor is Ranking Minority of Committee on Merchant Marine and Fisheries  
Sponsor is Ranking Minority of Committee on Post Office and Civil Service  
Sponsor is Ranking Minority of Committee on Transportation and Infrastructure



Sponsor is Ranking Minority of Committee on Rules  
Sponsor is Ranking Minority of Committee on Science  
Sponsor is Ranking Minority of Committee on Small Business  
Sponsor is Ranking Minority of Committee on Standards  
Sponsor is Ranking Minority of Committee on Veterans  
Sponsor is Ranking Minority of Committee on Ways and Means  
Sponsor is Ranking Minority of Committee on Un-American Activities  
Sponsor is Ranking Minority of Select Aging Committee  
Sponsor is Ranking Minority of Select Committee on Intelligence  
Sponsor is Ranking Minority of Select Committee on Children, Youth and Families  
Sponsor is Ranking Minority of Select Committee on Hunger  
Sponsor is Ranking Minority of Select Committee on Narcotics Abuse

Sponsor is a chamber leader  
Sponsor is a committee chair or ranking minority member  
Sponsor is a subcommittee chair or ranking minority member

Sponsor chairs a subcommittee  
Sponsor chairs subcommittee of Committee on Agriculture  
Sponsor chairs subcommittee of Committee on Appropriations  
Sponsor chairs subcommittee of Committee on Armed Services  
Sponsor chairs subcommittee of Committee on Banking  
Sponsor chairs subcommittee of Committee on Budget  
Sponsor chairs subcommittee of Committee on Government Reform  
Sponsor chairs subcommittee of Committee on Education  
Sponsor chairs subcommittee of Committee on Commerce  
Sponsor chairs subcommittee of Committee on International Relations  
Sponsor chairs subcommittee of Committee on Government Reform  
Sponsor chairs subcommittee of Committee on House Administration  
Sponsor chairs subcommittee of Committee on Resources  
Sponsor chairs subcommittee of Committee on Judiciary  
Sponsor chairs subcommittee of Committee on Merchant Marine and Fisheries  
Sponsor chairs subcommittee of Committee on Post Office and Civil Service  
Sponsor chairs subcommittee of Committee on Transportation and Infrastructure  
Sponsor chairs subcommittee of Committee on Rules  
Sponsor chairs subcommittee of Committee on Science  
Sponsor chairs subcommittee of Committee on Small Business  
Sponsor chairs subcommittee of Committee on Standards  
Sponsor chairs subcommittee of Committee on Veterans  
Sponsor chairs subcommittee of Committee on Ways and Means  
Sponsor chairs subcommittee of Committee on Un-American Activities  
Sponsor chairs subcommittee of Select Aging Committee  
Sponsor chairs subcommittee of Select Committee on Intelligence  
Sponsor chairs subcommittee of Select Committee on Children, Youth and Families  
Sponsor chairs subcommittee of Select Committee on Hunger  
Sponsor chairs subcommittee of Select Committee on Narcotics Abuse

Sponsor is Ranking minority of a subcommittee  
Sponsor is Ranking minority on subcommittee of Committee on Agriculture  
Sponsor is Ranking minority on subcommittee of Committee on Appropriations  
Sponsor is Ranking minority on subcommittee of Committee on Armed Services  
Sponsor is Ranking minority on subcommittee of Committee on Banking

Sponsor is Ranking minority on subcommittee of Committee on Budget  
Sponsor is Ranking minority on subcommittee of Committee on Government Reform  
Sponsor is Ranking minority on subcommittee of Committee on Education  
Sponsor is Ranking minority on subcommittee of Committee on Commerce  
Sponsor is Ranking minority on subcommittee of Committee on International Relations  
Sponsor is Ranking minority on subcommittee of Committee on Government Reform  
Sponsor is Ranking minority on subcommittee of Committee on House Administration  
Sponsor is Ranking minority on subcommittee of Committee on Resources  
Sponsor is Ranking minority on subcommittee of Committee on Judiciary  
Sponsor is Ranking minority on subcommittee of Committee on Merchant Marine and Fisheries  
Sponsor is Ranking minority on subcommittee of Committee on Post Office and Civil Service  
Sponsor is Ranking minority on subcommittee of Committee on Transportation and Infrastructure  
Sponsor is Ranking minority on subcommittee of Committee on Rules  
Sponsor is Ranking minority on subcommittee of Committee on Science  
Sponsor is Ranking minority on subcommittee of Committee on Small Business  
Sponsor is Ranking minority on subcommittee of Committee on Standards  
Sponsor is Ranking minority on subcommittee of Committee on Veterans  
Sponsor is Ranking minority on subcommittee of Committee on Ways and Means  
Sponsor is Ranking minority on subcommittee of Committee on Un-American Activities  
Sponsor is Ranking minority on subcommittee of Select Aging Committee  
Sponsor is Ranking minority on subcommittee of Select Committee on Intelligence  
  
Sponsor is Ranking minority on subcommittee of Select Committee on Children, Youth and Families  
  
Sponsor is Ranking minority on subcommittee of Select Committee on Hunger  
Sponsor is Ranking minority on subcommittee of Select Committee on Narcotics Abuse

**SOURCE (where applicable)**

<http://thomas.loc.gov>

<http://www.policyagendas.org/codebooks/index.html#topics>

<http://www.policyagendas.org/codebooks/index.html#topics>

<http://thomas.loc.gov>

<http://www.policyagendas.org/codebooks/house.html>

<http://thomas.loc.gov>

<http://thomas.loc.gov>

<http://thomas.loc.gov>

<http://cstl-cla.semo.edu/Renka/PRG/Data/Codebook.doc>

<http://cstl-cla.semo.edu/Renka/PRG/Data/Codebook.doc>

<http://cstl-cla.semo.edu/Renka/PRG/Data/Codebook.doc>

<http://cstl-cla.semo.edu/Renka/PRG/Data/Codebook.doc>

<http://cstl-cla.semo.edu/Renka/PRG/Data/Codebook.doc>

<http://www.voteview.com>

<http://www.voteview.com>

<http://cstl-cla.semo.edu/Renka/PRG/Data/Codebook.doc>

<http://cstl-cla.semo.edu/Renka/PRG/Data/Codebook.doc>

<http://www.voteview.com>

<http://cstl-cla.semo.edu/Renka/PRG/Data/Codebook.doc>

<http://cstl-cla.semo.edu/Renka/PRG/Data/Codebook.doc>

<http://cstl-cla.semo.edu/Renka/PRG/Data/Codebook.doc>

<http://cstl-cla.semo.edu/Renka/PRG/Data/Codebook.doc>

<http://cstl-cla.semo.edu/Renka/PRG/Data/Codebook.doc>

<http://cstl-cla.semo.edu/Renka/PRG/Data/Codebook.doc>

[http://web.mit.edu/17.251/www/data\\_page.html](http://web.mit.edu/17.251/www/data_page.html)





[http://web.mit.edu/17.251/www/data\\_page.html](http://web.mit.edu/17.251/www/data_page.html)  
[http://web.mit.edu/17.251/www/data\\_page.html](http://web.mit.edu/17.251/www/data_page.html)  
[http://web.mit.edu/17.251/www/data\\_page.html](http://web.mit.edu/17.251/www/data_page.html)  
[http://web.mit.edu/17.251/www/data\\_page.html](http://web.mit.edu/17.251/www/data_page.html)  
[http://web.mit.edu/17.251/www/data\\_page.html](http://web.mit.edu/17.251/www/data_page.html)  
[http://web.mit.edu/17.251/www/data\\_page.html](http://web.mit.edu/17.251/www/data_page.html)  
[http://web.mit.edu/17.251/www/data\\_page.html](http://web.mit.edu/17.251/www/data_page.html)  
[http://web.mit.edu/17.251/www/data\\_page.html](http://web.mit.edu/17.251/www/data_page.html)  
[http://web.mit.edu/17.251/www/data\\_page.html](http://web.mit.edu/17.251/www/data_page.html)  
[http://web.mit.edu/17.251/www/data\\_page.html](http://web.mit.edu/17.251/www/data_page.html)  
[http://web.mit.edu/17.251/www/data\\_page.html](http://web.mit.edu/17.251/www/data_page.html)  
[http://web.mit.edu/17.251/www/data\\_page.html](http://web.mit.edu/17.251/www/data_page.html)  
[http://web.mit.edu/17.251/www/data\\_page.html](http://web.mit.edu/17.251/www/data_page.html)  
[http://web.mit.edu/17.251/www/data\\_page.html](http://web.mit.edu/17.251/www/data_page.html)  
[http://web.mit.edu/17.251/www/data\\_page.html](http://web.mit.edu/17.251/www/data_page.html)  
[http://web.mit.edu/17.251/www/data\\_page.html](http://web.mit.edu/17.251/www/data_page.html)  
[http://web.mit.edu/17.251/www/data\\_page.html](http://web.mit.edu/17.251/www/data_page.html)  
[http://web.mit.edu/17.251/www/data\\_page.html](http://web.mit.edu/17.251/www/data_page.html)  
[http://web.mit.edu/17.251/www/data\\_page.html](http://web.mit.edu/17.251/www/data_page.html)  
[http://web.mit.edu/17.251/www/data\\_page.html](http://web.mit.edu/17.251/www/data_page.html)

[http://web.mit.edu/17.251/www/data\\_page.html](http://web.mit.edu/17.251/www/data_page.html)  
[http://web.mit.edu/17.251/www/data\\_page.html](http://web.mit.edu/17.251/www/data_page.html)  
[http://web.mit.edu/17.251/www/data\\_page.html](http://web.mit.edu/17.251/www/data_page.html)
